# Supplementary material for: Biomaterial Inks from Peptide-Functionalized Silk Fibers for 3D Printing of Futuristic Wound-Healing and Sensing Materials
Source: MDPI journal article supplement (doi:10.3390/ijms24020947), 2023-01-04
Supplement: s1 [file s1]

# Biomaterial Inks from Peptide-Functionalized Silk Fibers for 3D Printing of Futuristic Wound-Healing and Sensing Materials

**Maria Rachele Ceccarini <sup>1</sup>, Valentina Palazzi <sup>2</sup>, Raffaele Salvati <sup>2</sup>, Irene Chiesa <sup>3</sup>, Carmelo De Maria <sup>3</sup>, Stefania Bonafoni <sup>2</sup>, Paolo Mezzanotte <sup>2</sup>, Michela Codini <sup>1</sup>, Lorenzo Pacini <sup>4</sup>, Fosca Errante <sup>5</sup>, Paolo Rovero <sup>5</sup>, Antonino Morabito <sup>6</sup>, Tommaso Beccari <sup>1</sup>, Luca Roselli <sup>2</sup> and Luca Valentini <sup>7,\*</sup>**

<sup>1</sup> Department of Pharmaceutical Sciences, University of Perugia, 06123 Perugia, Italy

<sup>2</sup> Department of Engineering, University of Perugia, 06125 Perugia, Italy

<sup>3</sup> Department of Ingegneria dell'Informazione and Research Center E. Piaggio, University of Pisa, Largo Lucio Lazzarino 1, 56122 Pisa, Italy

<sup>4</sup> Interdepartmental Research Unit of Peptide and Protein Chemistry and Biology, Department of Chemistry "Ugo Schiff", University of Florence, 50019 Sesto Fiorentino, Italy

<sup>5</sup> Interdepartmental Research Unit of Peptide and Protein Chemistry and Biology, Department of NEUROFARBA, University of Florence, 50019 Sesto Fiorentino, Italy

<sup>6</sup> Dipartimento Neuroscienze, Psicologia, Area del Farmaco e Salute del Bambino NEUROFARBA, Università degli Studi di Firenze, Viale Pieraccini 6, 50121 Firenze, Italy

<sup>7</sup> Civil and Environmental Engineering Department, University of Perugia, Strada di Pentima 4, 05100 Terni, Italy

\* Correspondence: [luca.valentini@unipg.it](mailto:luca.valentini@unipg.it); Tel.: +39-0744492924

## Supporting Information

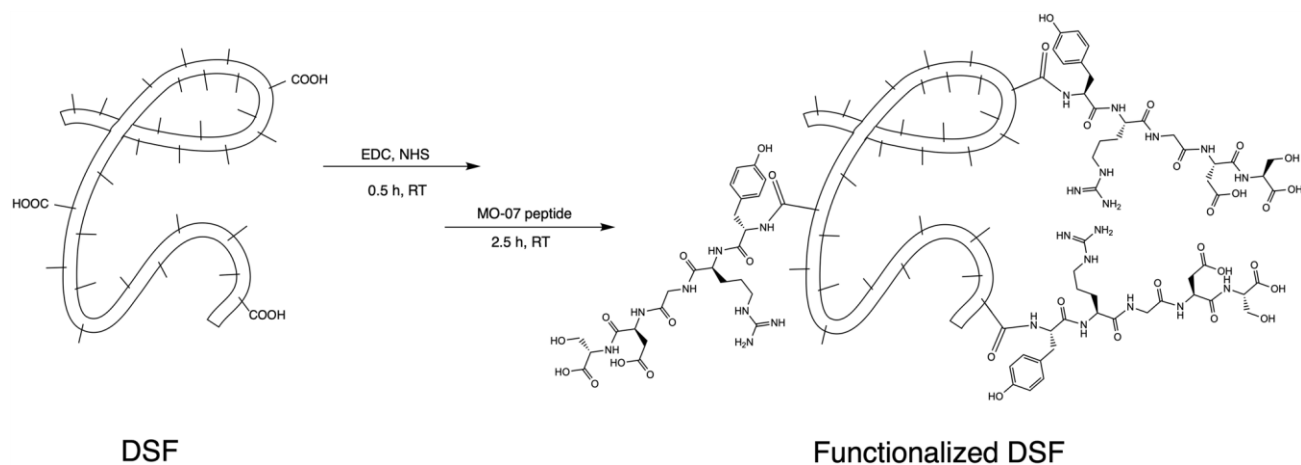

Figure S1. Scheme showing the synthetic pathway for activating -COOH residues on DSF and their reaction with the N-terminal amino group of MO-07 peptide.

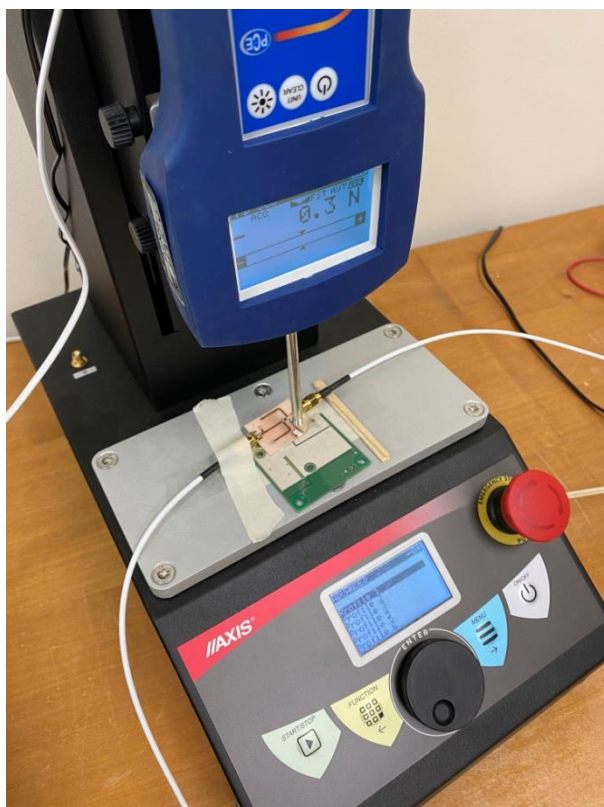

Figure S2. Photo of the dynamometer (model PCE-FB 500) connected to an automated vertical stand used for the piezoresistive measurements.

# Supporting Information

S1

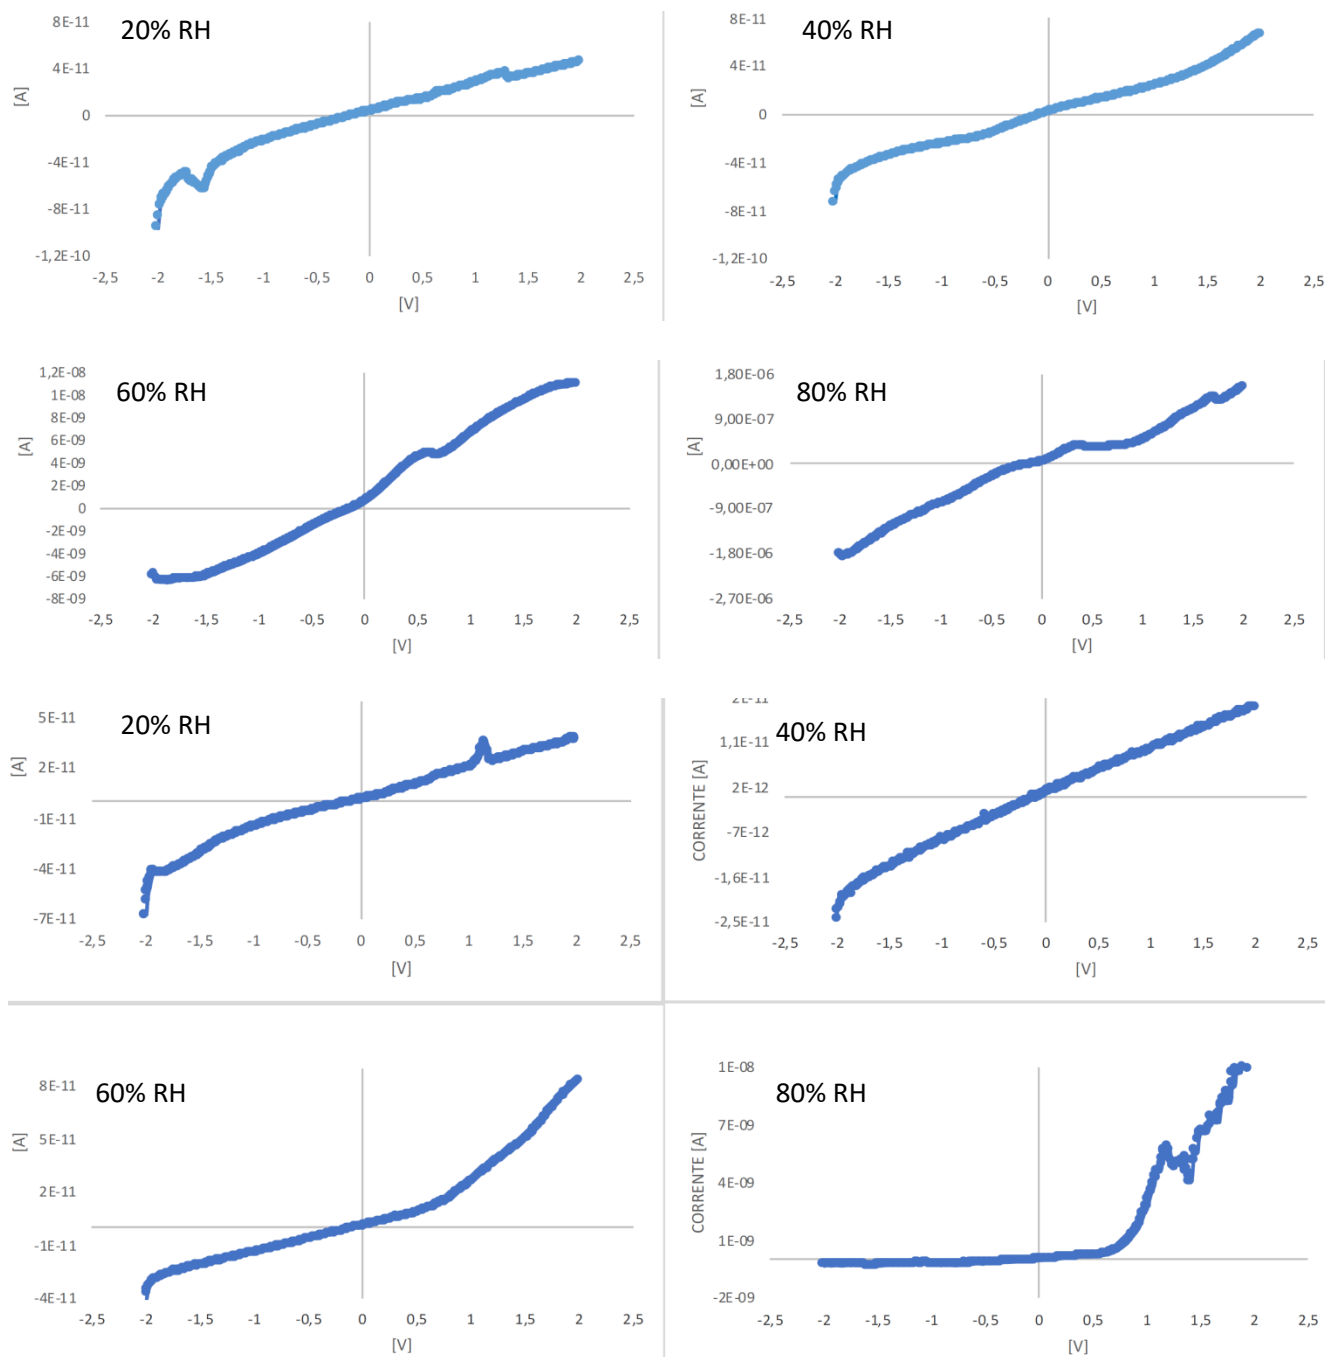

Figure S3. Current-voltage characteristics of (top) RS and (bottom) MO-07/RS 3D printed grids exposed to different values of RH.
